# Supplementary material for: Reconstructing Asian faunal introductions to eastern Africa from multi-proxy biomolecular and archaeological datasets
Source: PubMed Central journal article supplement (PMC5560628; doi:10.1371/journal.pone.0182565), 2017-08-17

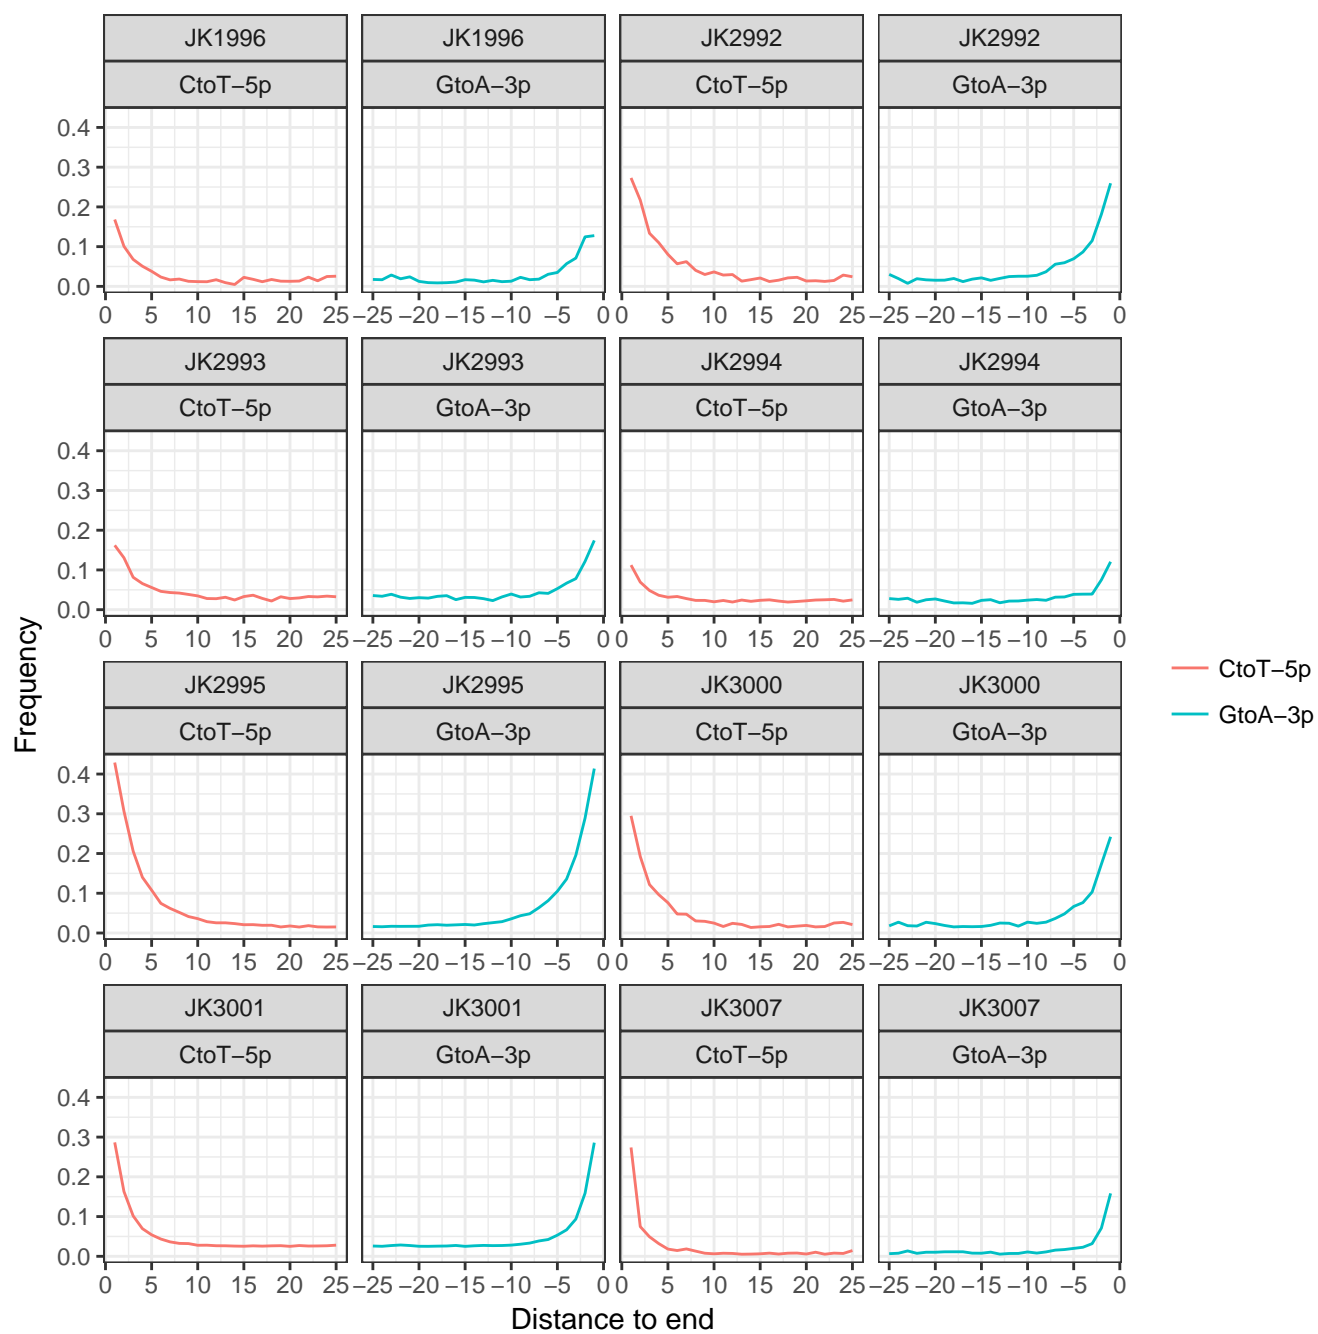

Supplement: pone.0182565.s011.pdf [file pone.0182565.s011.pdf]
